# Supplementary material for: Doped Ferrite Nanoparticles Exhibiting Self-Regulating Temperature as Magnetic Fluid Hyperthermia Antitumoral Agents, with Diagnostic Capability in Magnetic Resonance Imaging and Magnetic Particle Imaging
Source: MDPI journal article supplement (doi:10.3390/cancers14205150), 2022-10-20
Supplement: s1 [file s1]

## Supplementary Materials

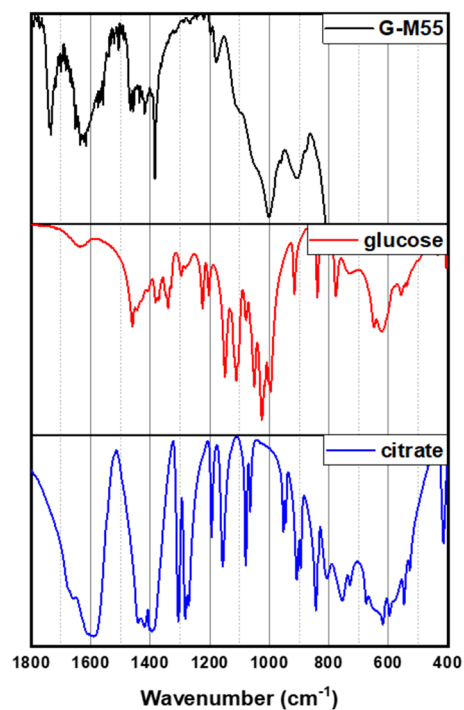

**Figure S1.** Detail of the FT-IR spectrum of G-M55 nanoparticles, sodium citrate and glucose molecules.

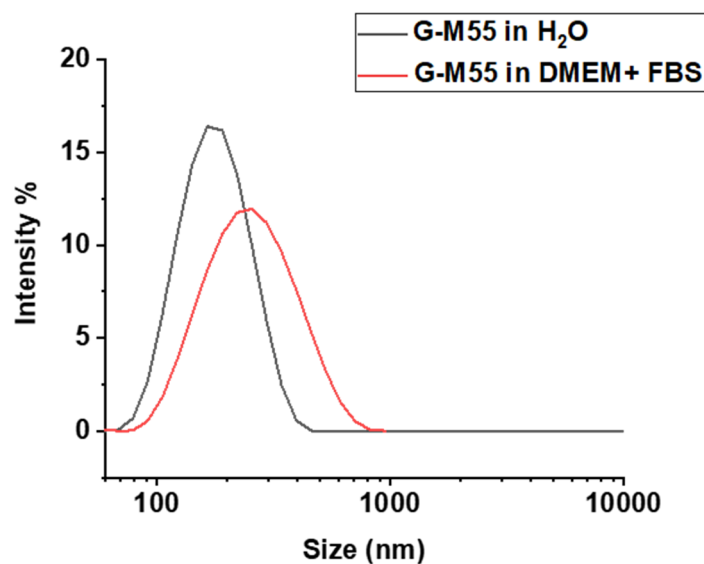

**Figure S2.** Hydrodynamic diameter of G-M55 NPs in water (black line) and in DMEM with 10% FBS (red line), using a NPs concentration of 6mg/mL.
